# Supplementary material for: Early modern human dispersal from Africa: genomic evidence for multiple waves of migration
Source: PubMed Central journal article supplement (PMC4636834; doi:10.1186/s13323-015-0030-2), 2015-11-06

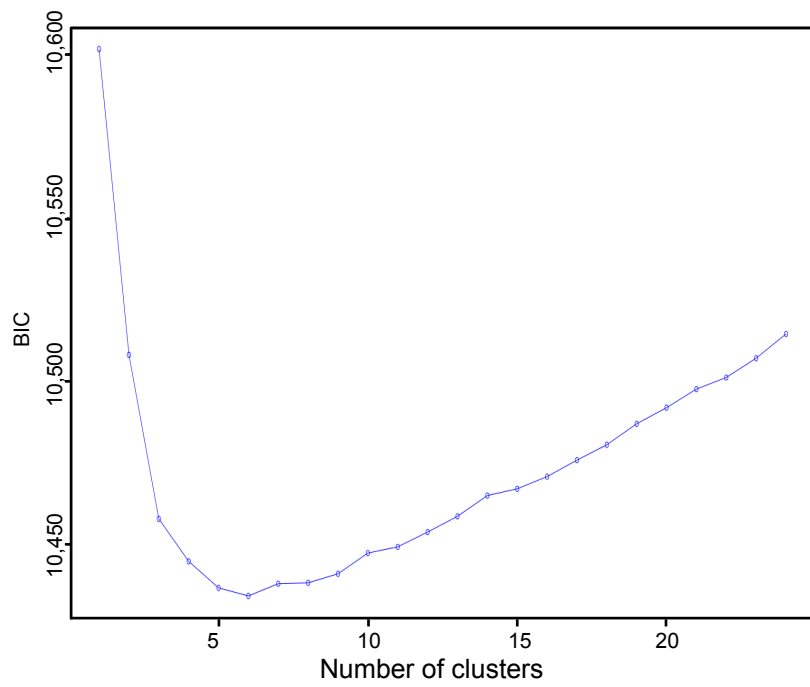

Supplement: 13323_2015_30_MOESM5_ESM.pdf [file 13323_2015_30_MOESM5_ESM.pdf]
