# Supplementary material for: Early modern human dispersal from Africa: genomic evidence for multiple waves of migration
Source: PubMed Central journal article supplement (PMC4636834; doi:10.1186/s13323-015-0030-2), 2015-11-06
Supplement: 13323_2015_30_MOESM10_ESM.pdf [file 13323_2015_30_MOESM10_ESM.pdf]

| TIME              | South_Africa  |                |                | East_Africa   |                |                | West_Africa    |                |                |
|-------------------|---------------|----------------|----------------|---------------|----------------|----------------|----------------|----------------|----------------|
|                   | 0.025         | 0.5            | 0.975          | 0.025         | 0.5            | 0.975          | 0.025          | 0.5            | 0.975          |
| Europe            | 66,226        | 74,595         | 84,924         | 62,664        | 69,736         | 78,916         | 73,102         | 81,354         | 90,852         |
| Caucasus          | 65,166        | 74,933         | 84,342         | 60,080        | 68,143         | 76,336         | 71,619         | 81,228         | 89,838         |
| West_Asia         | 66,093        | 73,546         | 82,512         | 60,187        | 66,318         | 74,087         | 72,342         | 79,715         | 87,970         |
| Central_Asia      | 70,530        | 76,762         | 87,029         | 65,785        | 71,021         | 80,083         | 77,427         | 83,596         | 93,062         |
| North_India       | 72,283        | 77,974         | 88,657         | 65,533        | 70,230         | 79,438         | 78,217         | 83,829         | 93,720         |
| South_India       | 64,381        | 69,703         | 78,031         | 59,931        | 64,396         | 71,782         | 70,879         | 76,166         | 83,809         |
| East_Asia         | 81,840        | 89,638         | 100,743        | 80,536        | 87,432         | 97,802         | 89,783         | 97,477         | 107,621        |
| South_Asia        | 76,716        | 85,002         | 95,110         | 73,452        | 80,587         | 89,791         | 84,104         | 92,279         | 101,504        |
| Malaysia          | 68,379        | 74,544         | 85,294         | 66,345        | 71,622         | 81,344         | 75,427         | 81,433         | 91,098         |
| Borneo            | 76,196        | 82,244         | 92,122         | 74,750        | 80,056         | 89,253         | 84,053         | 90,029         | 98,981         |
| Sumatra           | 76,978        | 84,720         | 95,240         | 75,306        | 82,043         | 91,758         | 84,643         | 92,222         | 101,689        |
| East_Indonesia    | 68,677        | 74,492         | 85,980         | 66,578        | 71,576         | 81,948         | 75,922         | 81,629         | 92,106         |
| Philippine        | 74,563        | 81,547         | 93,021         | 73,171        | 79,248         | 89,786         | 82,217         | 89,053         | 99,441         |
| Moluccas          | 67,447        | 73,760         | 83,966         | 66,115        | 71,562         | 80,897         | 74,783         | 80,951         | 90,113         |
| <b>Australia</b>  | <b>87,097</b> | <b>97,946</b>  | <b>113,933</b> | <b>87,017</b> | <b>96,599</b>  | <b>111,394</b> | <b>94,996</b>  | <b>105,461</b> | <b>119,900</b> |
| <b>New_Guinea</b> | <b>97,168</b> | <b>106,353</b> | <b>120,861</b> | <b>98,962</b> | <b>107,204</b> | <b>121,010</b> | <b>103,534</b> | <b>112,166</b> | <b>124,690</b> |
| Fiji              | 71,737        | 78,848         | 87,580         | 71,173        | 77,395         | 85,605         | 79,370         | 86,315         | 94,016         |
| Polynesia         | 70,269        | 77,397         | 88,039         | 71,230        | 77,531         | 87,551         | 78,186         | 85,110         | 94,553         |
| Onge              | 75,400        | 81,853         | 92,406         | 76,885        | 82,572         | 92,571         | 83,702         | 89,904         | 99,017         |
| Jehai             | 66,032        | 72,532         | 82,650         | 65,885        | 71,521         | 80,870         | 73,786         | 80,104         | 89,067         |
| Mamanwa           | 67,458        | 73,580         | 85,147         | 67,671        | 73,012         | 83,689         | 75,252         | 81,200         | 91,540         |
