# Supplementary material for: Early modern human dispersal from Africa: genomic evidence for multiple waves of migration
Source: PubMed Central journal article supplement (PMC4636834; doi:10.1186/s13323-015-0030-2), 2015-11-06
Supplement: 13323_2015_30_MOESM11_ESM.pdf [file 13323_2015_30_MOESM11_ESM.pdf]

| TIME           | South_Africa |         |         | East_Africa |         |         | West_Africa |         |         |
|----------------|--------------|---------|---------|-------------|---------|---------|-------------|---------|---------|
|                | 0.025        | 0.5     | 0.975   | 0.025       | 0.5     | 0.975   | 0.025       | 0.5     | 0.975   |
| Europe         | 66,439       | 74,835  | 85,197  | 62,892      | 69,990  | 79,204  | 73,357      | 81,638  | 91,169  |
| Caucasus       | 65,303       | 75,091  | 84,520  | 60,178      | 68,254  | 76,460  | 71,788      | 81,420  | 90,050  |
| West_Asia      | 66,348       | 73,829  | 82,830  | 60,456      | 66,614  | 74,419  | 72,613      | 80,013  | 88,299  |
| Central_Asia   | 70,630       | 76,871  | 87,152  | 65,953      | 71,201  | 80,287  | 77,582      | 83,764  | 93,248  |
| North_India    | 72,612       | 78,328  | 89,060  | 65,827      | 70,545  | 79,794  | 78,519      | 84,153  | 94,081  |
| South_India    | 64,608       | 69,948  | 78,306  | 60,135      | 64,615  | 72,026  | 71,110      | 76,414  | 84,082  |
| East_Asia      | 82,193       | 90,024  | 101,177 | 80,888      | 87,813  | 98,229  | 90,159      | 97,885  | 108,072 |
| South_Asia     | 76,962       | 85,275  | 95,415  | 73,752      | 80,916  | 90,158  | 84,389      | 92,591  | 101,848 |
| Malaysia       | 68,561       | 74,742  | 85,521  | 66,551      | 71,844  | 81,597  | 75,623      | 81,646  | 91,336  |
| Borneo         | 76,419       | 82,485  | 92,392  | 75,000      | 80,324  | 89,551  | 84,283      | 90,274  | 99,251  |
| Sumatra        | 77,292       | 85,065  | 95,628  | 75,650      | 82,418  | 92,177  | 84,990      | 92,600  | 102,106 |
| East_Indonesia | 68,821       | 74,649  | 86,161  | 66,771      | 71,783  | 82,186  | 76,159      | 81,884  | 92,394  |
| Philippine     | 74,840       | 81,850  | 93,367  | 73,550      | 79,658  | 90,251  | 82,590      | 89,457  | 99,892  |
| Moluccas       | 67,705       | 74,043  | 84,288  | 66,378      | 71,847  | 81,219  | 75,142      | 81,340  | 90,546  |
| Australia      | 87,110       | 97,961  | 113,951 | 87,057      | 96,644  | 111,446 | 95,130      | 105,609 | 120,069 |
| New_Guinea     | 97,273       | 106,468 | 120,992 | 99,053      | 107,302 | 121,121 | 103,811     | 112,466 | 125,023 |
| Fiji           | 71,879       | 79,003  | 87,753  | 71,344      | 77,580  | 85,810  | 79,569      | 86,531  | 94,252  |
| Polynesia      | 70,479       | 77,628  | 88,303  | 71,447      | 77,768  | 87,819  | 78,417      | 85,362  | 94,833  |
| Onge           | 75,670       | 82,147  | 92,738  | 77,173      | 82,881  | 92,918  | 83,983      | 90,206  | 99,349  |
| Jehai          | 66,223       | 72,742  | 82,889  | 66,108      | 71,763  | 81,143  | 73,966      | 80,300  | 89,284  |
| Mamanwa        | 67,531       | 73,660  | 85,240  | 67,779      | 73,129  | 83,822  | 75,354      | 81,310  | 91,664  |
